# Supplementary material for: Self-assembly and thermotropic liquid crystal properties of a hexavacant germanomolybdate: [Ge2Mo16O58]12−
Source: Royal Society of Chemistry journal article supplement (doi:10.1039/c4ce00536h), 2014-01-01
Supplement: c4ce00536h1.pdf [file c4ce00536h1.pdf]

## Supporting Information

### **Self-assembly and thermotropic liquid crystal property of a hexavacant germanomolybdate: $[\text{Ge}_2\text{Mo}_{16}\text{O}_{58}]^{12-}$**

Yan-Qing Gao, Zhi-Ming Zhang,\* Jian-Qiang Shen, Yue Jia, Zhu-Jun Liu, En-Bo

Wang\*

Key laboratory of Polyoxometalate Science of Ministry of Education, Department of  
Chemistry, Northeast Normal University, Renmin Street No.5268, Changchun, Jilin,  
130024, P. R. China.

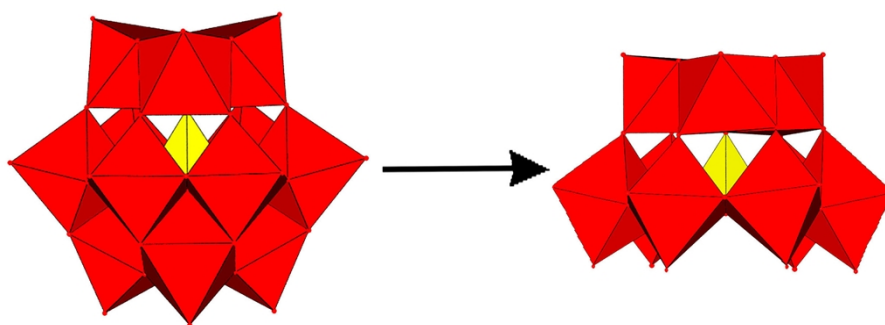

**Fig. S1.** The formation of  $\{\beta\text{-A-GeMo}_9\text{O}_{34}\}$ .

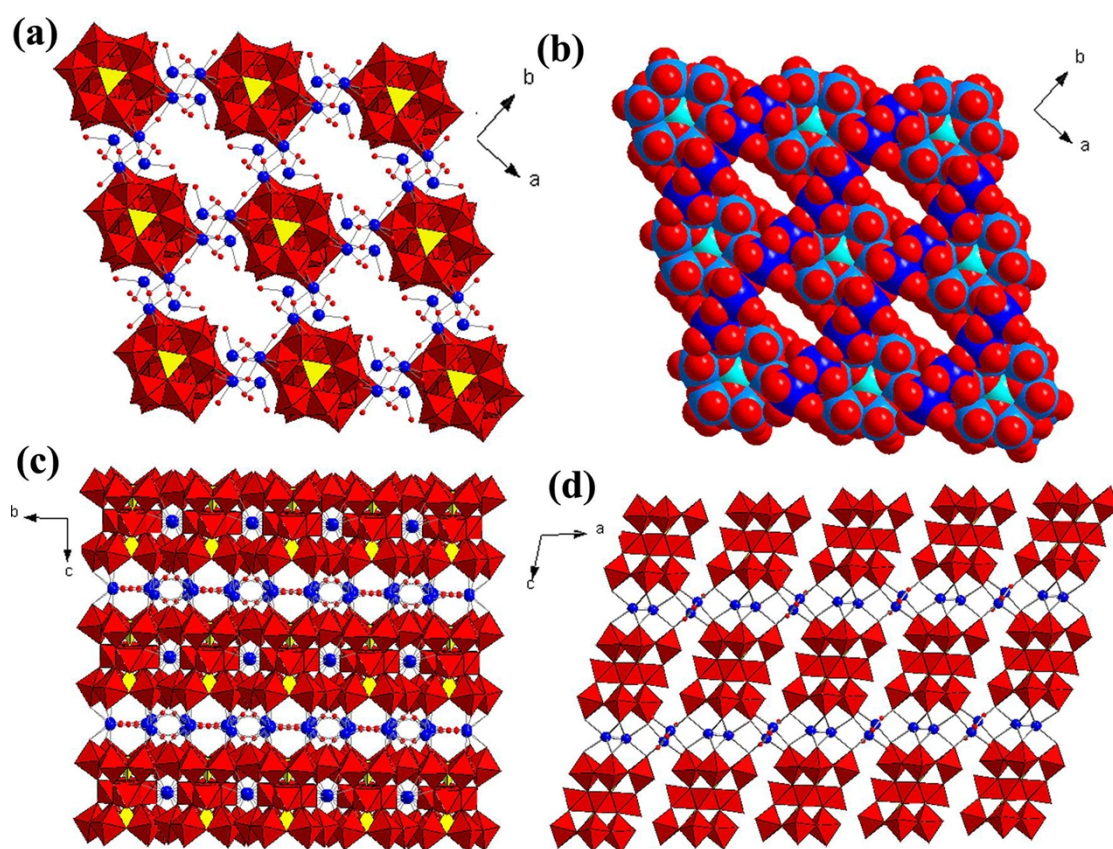

**Fig. S2.** The 3D framework of compound **2** along different directions.

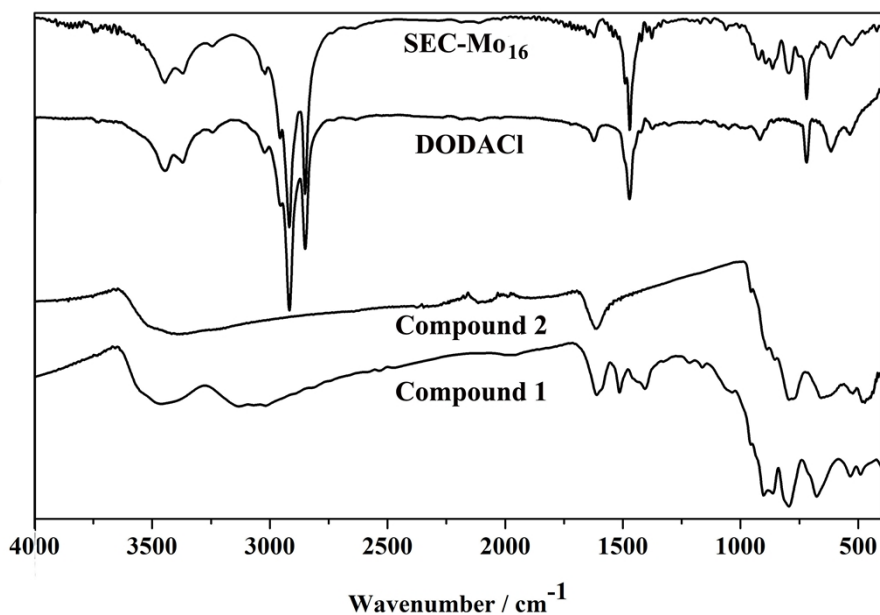

**Fig. S3.** The IR spectra of compound **1**, compound **2**, DODACl and **SEC-Mo<sub>16</sub>**.

The IR spectra of compound **1** shows the characteristic bands at 900-676  $\text{cm}^{-1}$ , corresponding to terminal Mo-Ot vibrations, Ge-O vibrations and Mo-O bridges vibrations, respectively. In addition, the vibration bands at 1611-1405  $\text{cm}^{-1}$  can be assigned to the bending vibration bands of -NH<sub>2</sub>, -CH<sub>3</sub> and -CH<sub>2</sub>. Moreover, the stretching bands of -OH and -NH<sub>2</sub> groups are observed at 3462 and 3131  $\text{cm}^{-1}$ , respectively. The IR spectra of compound **2** shows the characteristic bands at 883-654  $\text{cm}^{-1}$ , corresponding to terminal Mo-Ot vibrations, Ge-O vibrations and Mo-O bridges vibrations, respectively. In addition, the vibration bands at 1610 and 3397  $\text{cm}^{-1}$  can be assigned to the bending vibration band and stretching band of -OH, respectively. By comparison the IR spectra of compound **1**, compound **2**, DODACl and **SEC-Mo<sub>16</sub>**, we can clearly observe that the difference between **SEC-Mo<sub>16</sub>** and DODACl is the peaks in the low-wave number region, corresponding to the characteristic peaks of compound **1** and compound **2**, indicating the existence of DODA<sup>+</sup> and polyoxoanion

$[\text{Ge}_2\text{Mo}_{16}\text{O}_{58}]^{12-}$  in **SEC-Mo<sub>16</sub>**.

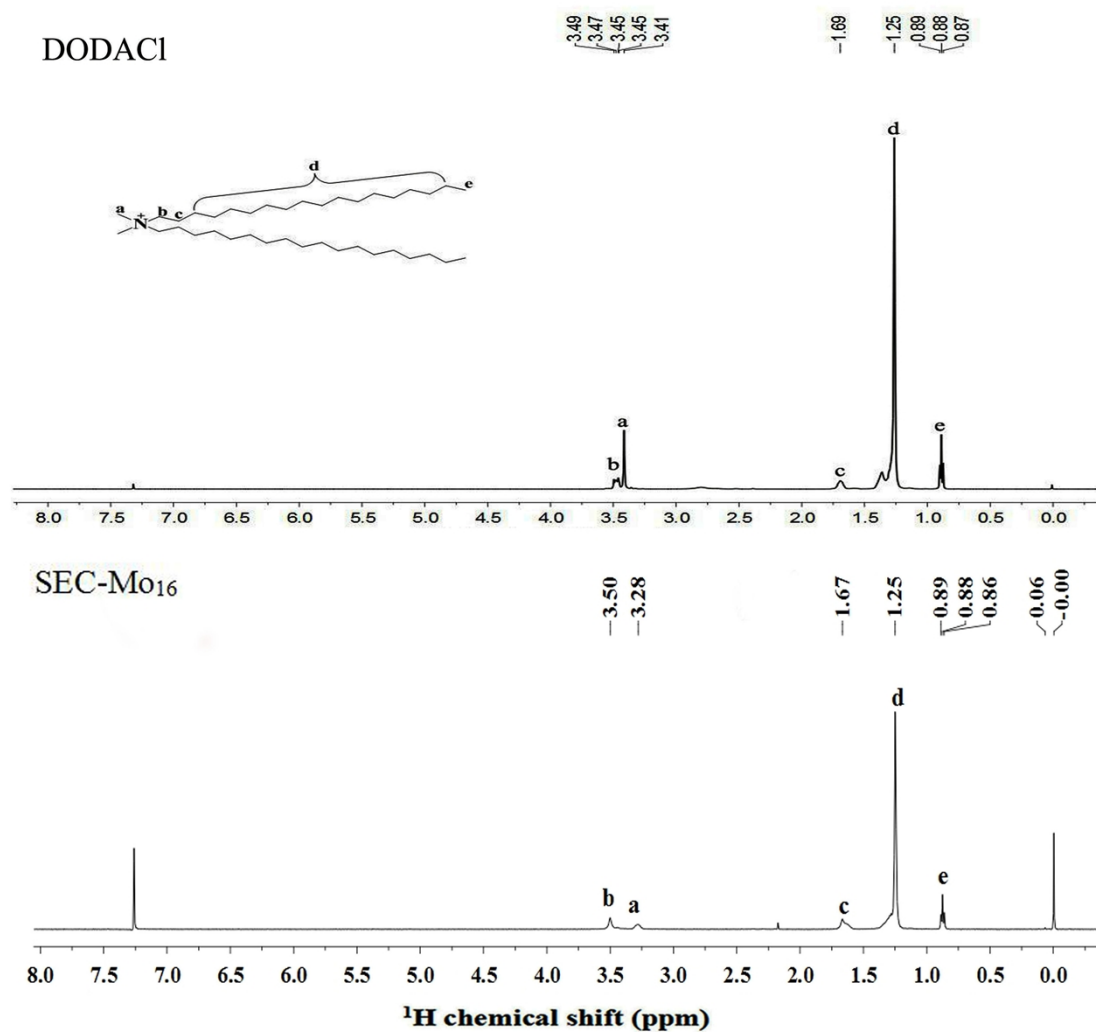

**Fig. S4.** The  $^1\text{H}$  NMR spectra of DODACl and **SEC-Mo<sub>16</sub>**.

The  $^1\text{H}$  NMR spectra of DODACl exhibits five types of hydrogens of different chemical environments, which can also be observed in the  $^1\text{H}$  NMR spectra of **SEC-Mo<sub>16</sub>**, indicating the existence of  $\text{DODA}^+$  in **SEC-Mo<sub>16</sub>**.

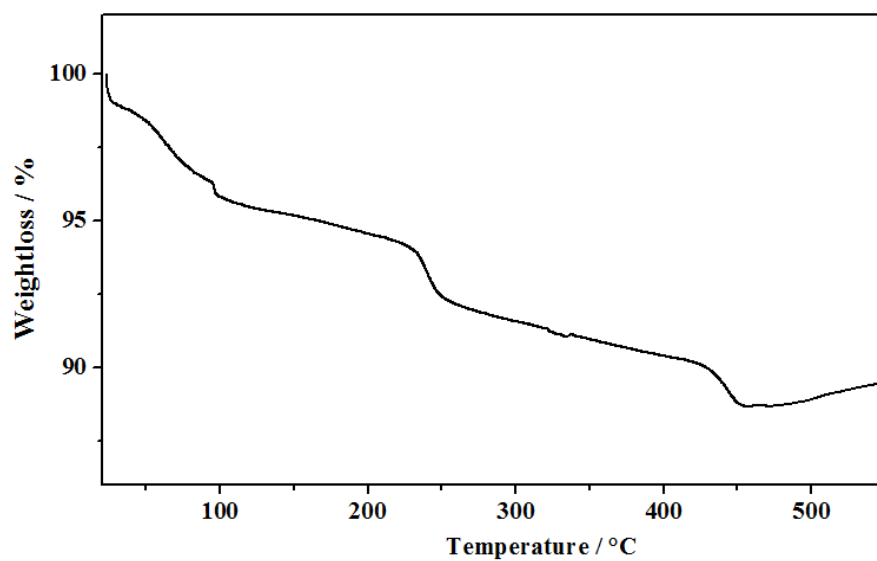

**Fig. S5.** The TG curve of compound **1**. The TG curve of compound **1** shows two steps of weight loss, the total loss is 11.4 % (calc. 14.7 %).

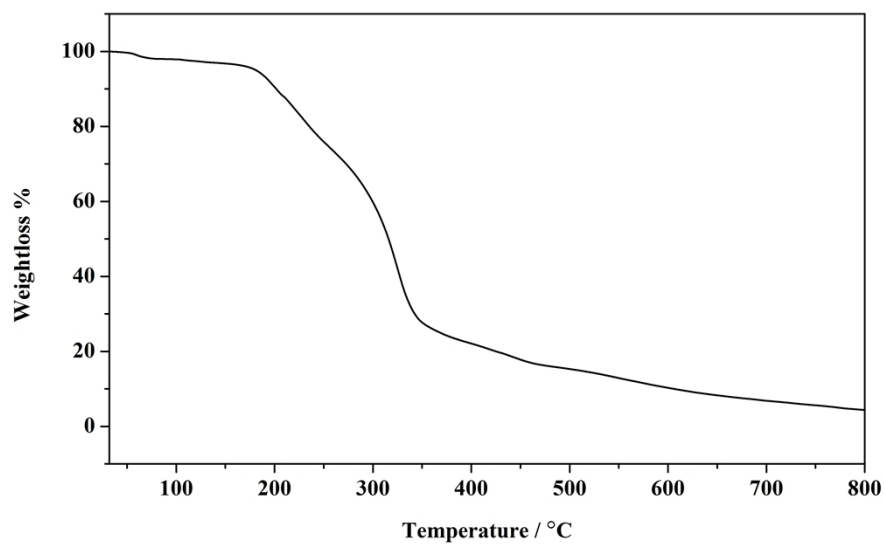

**Fig. S6.** The TG curve of SEC-Mo<sub>16</sub>.

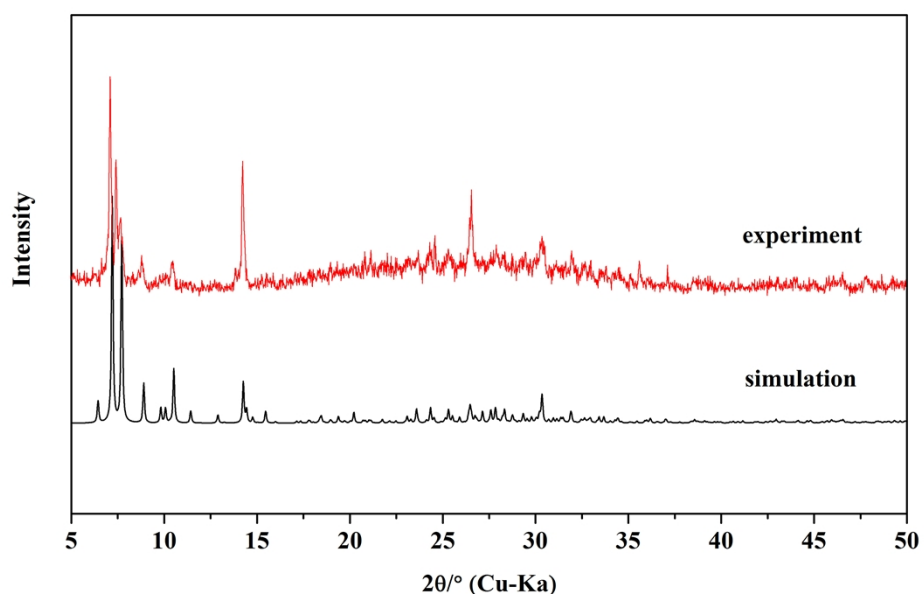

**Fig. S7.** The PXRD patterns of compound **1**.
